# Supplementary figures and images for: Stereological study of the neuronal number and volume of 38 brain subdivisions of subjects diagnosed with autism reveals significant alterations restricted to the striatum, amygdala and cerebellum
Source: Springer Nature journal article supplement (doi:10.1186/s40478-014-0141-7), 2014-09-17

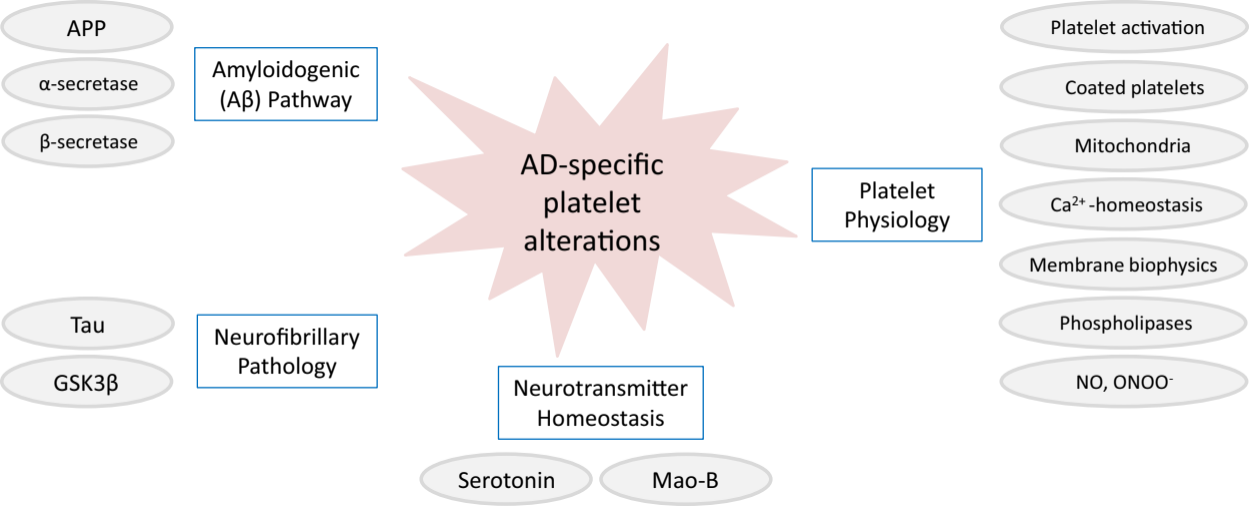

Supplement: MOESM1 [file 25658242]
